# Supplementary material for: Abrogation of store-operated Ca2+ entry protects against crystal-induced ER stress in human proximal tubular cells
Source: PubMed Central journal article supplement (PMC6680047; doi:10.1038/s41420-019-0203-5), 2019-08-05
Supplement: 41420_2019_203_MOESM1_ESM.pdf [file 41420_2019_203_MOESM1_ESM.pdf]

**A**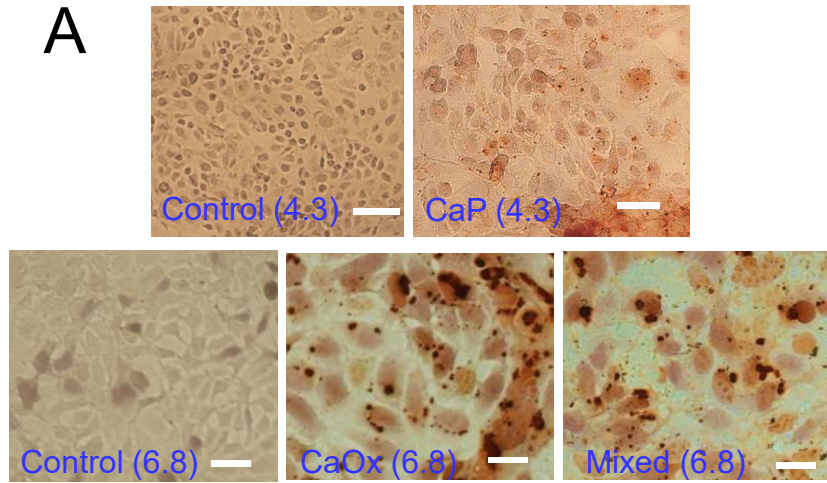**B**

| Primer | Sequence (sense, antisense)                                                  |
|--------|------------------------------------------------------------------------------|
| hSTIM1 | 5'-TGT GGA GCT GCC TCA GTA TG -3'<br>5'-AAG AGA GGA GGC CCA AAG AG -3'       |
| hSTIM2 | 5'-TGT CAC TGA GTC CAC CAT GC -3'<br>5'-GGG CGT GTT AGA GGT CCA AA -3'       |
| hOrai1 | 5'-AGC AAC GTG CAC AAA TCT CAA -3'<br>5'-GTC TAT GGC TAA CCA GTG A -3'       |
| hOrai2 | 5'-CGG CCA TAA GGG CAT GGA TT -3'<br>5'-TTG TGG ATG TTG CTC ACG GC -3'       |
| hOrai3 | 5'-CTC TTC CTT GCT GAA GTT GT -3'<br>5'-CGA TTC AGT TCC TCT AGT TC -3'       |
| hERN1  | 5'-AGA GAA GCA GAC TTT GTC -3'<br>5'-GTT TTG GTG TCG TAC ATG GTG A -3'       |
| hCLDN1 | 5'-GGT GCA GAA GAT GAG GGC TG -3'<br>5'-AGC CAG TGA AGA GAG CCT GAC G -3'    |
| hGRP78 | 5'-GGA TCA TCA ACG AGC CTA CG -3'<br>5'-CAC CCA GGT CAA ACA CCA G -3'        |
| hGAPDH | 5'-ATC GTG GGG CGC CCC AGG CAC -3'<br>5'-CTC CTT AAT GTC ACG CAC GAT TTC -3' |
